# Supplementary material for: A Genome Scan for Genes Underlying Microgeographic-Scale Local Adaptation in a Wild Arabidopsis Species
Source: PLoS Genet. 2015 Jul 14;11(7):e1005361. doi: 10.1371/journal.pgen.1005361 (PMC4501782; doi:10.1371/journal.pgen.1005361)
Supplement: S1 Table — (XLS) [file pgen.1005361.s005.xls]

## Sheet: Table S1
S1 Table. Details of the individuals and populations analysed in the present study.
Individual ID	Site	Altitude	Latitude	Longitude	Input bases for mapping	Mapped bases	Coverage fold to reference	Raw number of detected SNPs
IB038002	Mt. Ibuki	380 m	35.3959	136.387	5432281939	3649101656	14.47	117396
IB038004	Mt. Ibuki	380 m	35.3959	136.387	4918342668	3264472841	12.9448	112778
IB038005	Mt. Ibuki	380 m	35.3959	136.387	5301831449	3486473566	13.8251	136057
IB038006	Mt. Ibuki	380 m	35.3959	136.387	5591997767	3531145620	14.0022	134410
IB038007	Mt. Ibuki	380 m	35.3959	136.387	5568506665	3360218436	13.3244	119315
IB060001	Mt.Ibuki	600 m	35.3989	136.394	5281203224	3367786419	13.3544	120442
IB060002	Mt.Ibuki	600 m	35.3989	136.394	5021208880	3322454510	13.1747	131404
IB060003	Mt.Ibuki	600 m	35.3989	136.394	5546345731	3460381381	13.7216	142127
IB060004	Mt.Ibuki	600 m	35.3989	136.394	4260646108	2815122682	11.1629	124029
IB060005	Mt.Ibuki	600 m	35.3989	136.394	5522832136	3599436958	14.273	127920
IB100001	Mt. Ibuki	1000 m	35.4135	136.401	5352260226	3480568304	13.8017	176969
IB100002	Mt. Ibuki	1000 m	35.4135	136.401	5512029426	3349839287	13.2833	147307
IB100003	Mt. Ibuki	1000 m	35.4135	136.401	5330908515	3310392993	13.1269	175184
IB100004	Mt. Ibuki	1000 m	35.4135	136.401	5463111237	3572204942	14.165	174995
IB100005	Mt. Ibuki	1000 m	35.4135	136.401	5268671768	3378922905	13.3986	172052
IB125001	Mt.Ibuki	1250 m	35.4162	136.402	5011131333	3252326843	12.8966	180138
IB125002	Mt.Ibuki	1250 m	35.4162	136.402	5009107899	3204061633	12.7052	183311
IB125003	Mt.Ibuki	1250 m	35.4162	136.402	5034030215	3191610457	12.6559	179405
IB125004	Mt.Ibuki	1250 m	35.4162	136.402	4990696419	3232272034	12.8171	169803
IB125005	Mt.Ibuki	1250 m	35.4162	136.402	5276593655	3405006298	13.502	192793
FJ020001	Mt. Fujiwara	200 m	35.1759	136.468	5458460471	3445463207	13.6625	215593
FJ020003	Mt. Fujiwara	200 m	35.1759	136.468	5256781849	3119041695	12.3681	186974
FJ020005	Mt. Fujiwara	200 m	35.1759	136.468	5182808485	3268193327	12.9595	193400
FJ020006	Mt. Fujiwara	200 m	35.1759	136.468	5009699184	3399599138	13.4806	190242
FJ020007	Mt. Fujiwara	200 m	35.1759	136.468	3823742210	2671271302	10.5925	171187
FJ040001	Mt. Fujiwara	400 m	35.1726	136.464	5544852015	3502055119	13.8869	199952
FJ040002	Mt. Fujiwara	400 m	35.1726	136.464	5217908875	2789595936	11.0617	146757
FJ040003	Mt. Fujiwara	400 m	35.1726	136.464	5233284926	2916603624	11.5654	155474
FJ040004	Mt. Fujiwara	400 m	35.1726	136.464	4577810234	2898290578	11.4927	175174
FJ040005	Mt. Fujiwara	400 m	35.1726	136.464	4100892984	2980210559	11.8176	149445
FJ070001	Mt. Fujiwara	700 m	35.1698	136.459	5562869209	3429344594	13.5985	191792
FJ070002	Mt. Fujiwara	700 m	35.1698	136.459	5342947676	3308299809	13.1186	186376
FJ070003	Mt. Fujiwara	700 m	35.1698	136.459	5386165257	3207076853	12.7172	188198
FJ070004	Mt. Fujiwara	700 m	35.1698	136.459	4273369526	2692455942	10.6765	152416
FJ070005	Mt. Fujiwara	700 m	35.1698	136.459	4538682060	3022425728	11.985	201809
FJ110001	Mt. Fujiwara	1100 m	35.164	136.454	5311635658	3376721576	13.3899	187111
FJ110003	Mt. Fujiwara	1100 m	35.164	136.454	4635459565	3069312447	12.1709	138320
FJ110004	Mt. Fujiwara	1100 m	35.164	136.454	5229072878	3167542799	12.5604	127610
FJ110006	Mt. Fujiwara	1100 m	35.164	136.454	3786230939	2634151669	10.4453	179195
FJ110008	Mt. Fujiwara	1100 m	35.164	136.454	3299435224	2321718655	9.20643	148976
MN022005	Minoo	220 m	34.8528	135.472	4400848293	2832362376	11.2313	187307
MN022006	Minoo	220 m	34.8528	135.472	4996787482	3339507849	13.2423	183578
MN022007	Minoo	220 m	34.8528	135.472	3982723776	2670441212	10.5892	183977
MN022008	Minoo	220 m	34.8528	135.472	4185318645	2805115868	11.1233	190798
IN023001	Inotani	230 m	36.4789	137.238	4177573250	2550213136	10.1125	172052
IN023002	Inotani	230 m	36.4789	137.238	3776422027	2360078061	9.35853	166255
IN023003	Inotani	230 m	36.4789	137.238	3797880904	2315200501	9.18058	163805
IN023004	Inotani	230 m	36.4789	137.238	4937722446	2992758106	11.8673	209217
IT052001	Itamuro	520 m	37.0501	139.93	5211319769	3138794655	12.4464	186599
IT052002	Itamuro	520 m	37.0501	139.93	5412184729	3137133790	12.4398	179488
IT052003	Itamuro	520 m	37.0501	139.93	5248592571	3227863936	12.7996	211089
IT052004	Itamuro	520 m	37.0501	139.93	5229710269	2980408547	11.8184	195156
OK037001	Okunikkawa	370 m	38.3284	140.579	5308331610	3314833886	13.1445	201944
OK037002	Okunikkawa	370 m	38.3284	140.579	5428713491	3349767569	13.283	199211
OK037003	Okunikkawa	370 m	38.3284	140.579	5616683988	3430910639	13.6048	198967
OK037006	Okunikkawa	370 m	38.3284	140.579	4448806122	2961380670	11.7429	183946
Latitudes and longitudes are in decimal degree. Input bases are the total number of bases of trimmed reads used for mapping procedure, and coverage folds are calculated based on total bases of the reference genome.
